# Supplementary material for: Polypyrrole-stabilized gold nanorods with enhanced photothermal effect towards two-photon photothermal therapy
Source: Royal Society of Chemistry journal article supplement (doi:10.1039/c5tb00560d), 2015-01-01
Supplement: c5tb00560d1.pdf [file c5tb00560d1.pdf]

## Supporting Information

### Polypyrrole Stabilized Gold nanorods with Enhanced Photothermal Effect towards Two-Photon Photothermal Therapy

Cuiling Du<sup>a</sup>, Anhe Wang<sup>a</sup>, Jinbo Fei<sup>b</sup>, Jie Zhao<sup>b</sup> and Junbai Li<sup>a,b\*</sup>

<sup>a</sup>National Center for Nanoscience and Technology, Zhong guan cun, Beijing, 100190  
China

E-mail: jbli@iccas.ac.cn

<sup>b</sup>Beijing National Laboratory for Molecular Sciences, Key Laboratory of Colloid,  
Interface Science and Chemical Thermodynamics, Institute of Chemistry, Chinese  
Academy of Sciences, Beijing 100190 China

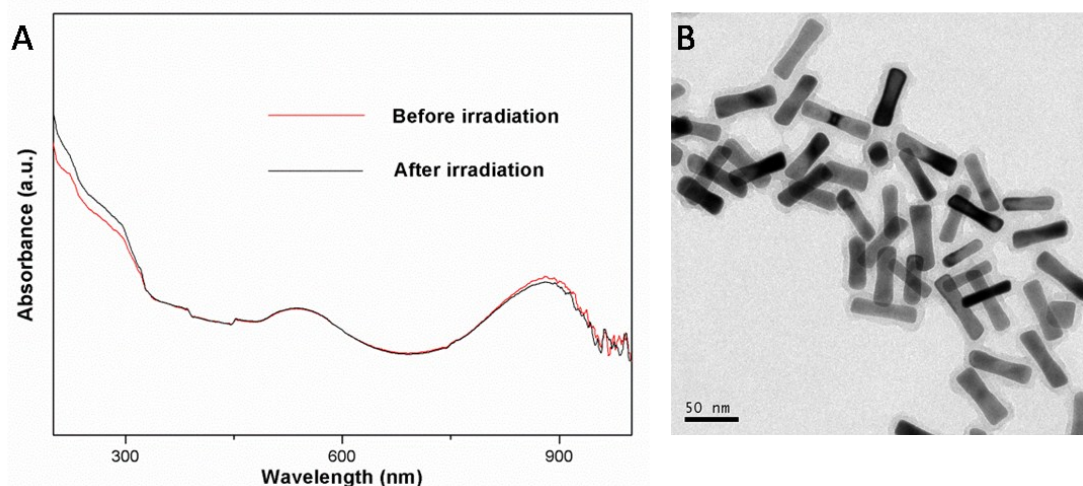

Figure S1. (A) The UV-vis spectra of Au-PPy nanorods before and after the irradiation of the NIR laser (808 nm, 3 W). (B) The TEM image of Au-PPy nanorods after irradiation.

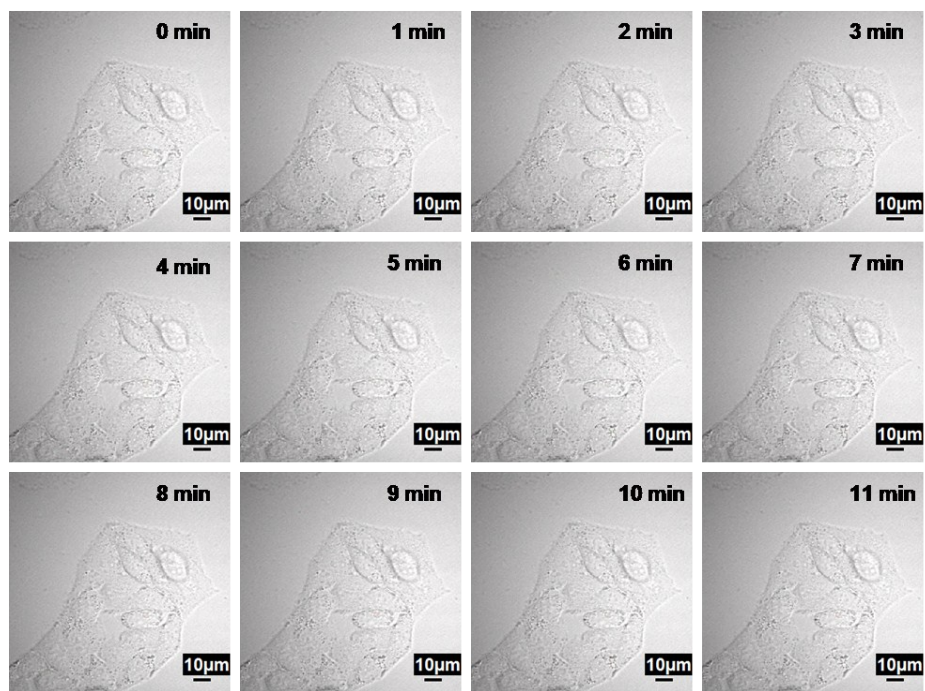

Figure S2. The CLSM images of HeLa cells without Au-PPy during the time scanning process with a two-photon laser at 880 nm.
